# Supplementary material for: Prognostic Value of Axillary Lymph Node Texture Parameters Measured by Pretreatment 18F-Fluorodeoxyglucose Positron Emission Tomography/Computed Tomography in Locally Advanced Breast Cancer with Neoadjuvant Chemotherapy
Source: MDPI journal article supplement (doi:10.3390/diagnostics12102285), 2022-09-22
Supplement: s1 [file s1]

Table S1. PET-based texture features extracted from CGITA.

| Feature family of IBSI <sup>a</sup> | Parent matrix of CGITA <sup>b</sup> | Texture features of CGITA          |
|-------------------------------------|-------------------------------------|------------------------------------|
| Tumor texture features              |                                     |                                    |
| Cooccurrence matrix                 | Cooccurrence                        | Second angular moment              |
|                                     |                                     | Contrast                           |
|                                     |                                     | Entropy                            |
|                                     |                                     | Dissimilarity                      |
|                                     |                                     | Inverse difference moment          |
| Run length matrix                   | Voxel-alignment                     | Long run emphasis                  |
|                                     |                                     | Intensity variability              |
|                                     |                                     | Run length variability             |
|                                     |                                     | Run percentage                     |
|                                     |                                     | High intensity run emphasis        |
| Neighborhood gray tone difference   | Neighborhood intensity difference   | Coarseness                         |
|                                     |                                     | Contrast                           |
|                                     |                                     | Busyness                           |
|                                     |                                     | Complexity                         |
|                                     |                                     | Strength                           |
| Intensity size zone matrix          | Intensity size zone                 | Short zone emphasis                |
|                                     |                                     | Large zone emphasis                |
|                                     |                                     | Intensity variability              |
|                                     |                                     | Size zone variability              |
|                                     |                                     | High intensity zone emphasis       |
|                                     |                                     | Low intensity short zone emphasis  |
|                                     |                                     | High intensity short zone emphasis |
|                                     |                                     | Low intensity large zone emphasis  |
|                                     |                                     | High intensity large zone emphasis |
| Cooccurrence matrix                 | Normalized cooccurrence             | Correlation                        |
| Intensity based statistics          | SUV statistics                      | Minimum SUV                        |
|                                     |                                     | Maximum SUV                        |
|                                     |                                     | Mean SUV                           |
|                                     |                                     | SUV Variance                       |
|                                     |                                     | SUV SD <sup>c</sup>                |
|                                     |                                     | SUV Skewness                       |
|                                     |                                     | SUV Kurtosis                       |
|                                     |                                     | SUV bias corrected Skewness        |
|                                     |                                     | SUV bias corrected Kurtosis        |
|                                     |                                     | TLG <sup>d</sup>                   |
|                                     |                                     | Tumor volume                       |
| Morphologic feature matrix          | Texture feature coding cooccurrence | Second angular moment              |
|                                     |                                     | Contrast                           |
|                                     |                                     | Entropy                            |
|                                     |                                     | Homogeneity                        |
|                                     |                                     | Intensity                          |
|                                     |                                     | Inverse difference moment          |
|                                     |                                     | Code entropy                       |
| Neighboring gray level dependence   | Neighboring gray level dependence   | Small number emphasis              |
|                                     |                                     | Large number emphasis              |
|                                     |                                     | Number nonuniformity               |
|                                     |                                     | Entropy                            |
| ALN texture features                |                                     |                                    |
| Intensity based statistics          | SUV statistics                      | Minimum SUV                        |
|                                     |                                     | Maximum SUV                        |
|                                     |                                     | Mean SUV                           |
|                                     |                                     | SUV Variance                       |
|                                     |                                     | SUV SD                             |

|  |  |                             |
|--|--|-----------------------------|
|  |  | SUV Skewness                |
|  |  | SUV Kurtosis                |
|  |  | SUV bias corrected Skewness |
|  |  | SUV bias corrected Kurtosis |
|  |  | TLG                         |
|  |  | Tumor volume                |

<sup>a</sup> IBSI = Imaging Biomarker Standardization Initiative, <sup>b</sup> CGITA = Chang-Gung Image Texture Analysis toolbox, <sup>c</sup> SD = standard deviation, <sup>d</sup> TLG = total lesion glycolysis.
